1 **Genome wide analysis of gene dosage in 24,092 individuals shows that 10,000 genes**  
2 **modulate cognitive ability**

3  
4 **Single sentence summary:** CNVs' effect-sizes on intelligence are predicted using measures of  
5 intolerance to haploinsufficiency and are distributed across half of the coding genes.

6 **AUTHORS:**

7 Guillaume Huguet<sup>1,2\*\*</sup>; Catherine Schramm<sup>1,2,3\*\*</sup>; Elise Douard<sup>1,2</sup>; Tamer Petra<sup>1,2</sup>, Antoine  
8 Main<sup>2,4</sup>; Pauline Monin<sup>2,5</sup>; Jade England<sup>1,2</sup>; Khadije Jizi<sup>1,2</sup>; Thomas Renne<sup>2,6</sup>; Myriam Poirier<sup>1,2</sup>;  
9 Sabrina Nowak<sup>1,2</sup>; Charles-Olivier Martin<sup>1,2</sup>; Nadine Younis<sup>1,2</sup>; Inga Sophia Knoth<sup>1,2</sup>; Martineau  
10 Jean-Louis<sup>1,2</sup>; Zohra Saci<sup>1,2</sup>; Maude Auger<sup>1,2</sup>; Frédérique Tihy<sup>1,2</sup>; Géraldine Mathonnet<sup>1,2</sup>;  
11 Catalina Maftai<sup>1,2</sup>; France Léveillé<sup>1,2</sup>; David Porteous<sup>7,8,9</sup>, Gail Davies<sup>7</sup>, Paul Redmond<sup>7</sup>, Sarah E.  
12 Harris<sup>7</sup>, W. David Hill<sup>7</sup>, Emmanuelle Lemyre<sup>1,2</sup>; Gunter Schumann<sup>10</sup>; Thomas Bourgeron<sup>11,12,13</sup>;  
13 Zdenka Pausova<sup>14</sup>; Tomas Paus<sup>15,16,17</sup>; Sherif Karama<sup>18,19,20</sup>; Sarah Lippe<sup>2,21</sup>; Ian J. Deary<sup>7</sup>; Laura  
14 Almasy<sup>22</sup>; Aurélie Labbe<sup>4</sup>; David Glahn<sup>23</sup>; Celia M.T. Greenwood<sup>3,24</sup>; Sébastien Jacquemont<sup>1,2</sup>

15  
16 \*\* Shared first authorship

17  
18 1 Department of Pediatrics, Université de Montréal, Montreal, Quebec, Canada

19 2 Center Hospitalier Universitaire Sainte-Justine Research Center, Montreal, Quebec, Canada

20 3 Lady Davis Institute for Medical Research, Jewish General Hospital, Montreal, Quebec, Canada

21 4 Département de Sciences de la Décision, HEC Montreal, Montreal, Quebec, Canada

22 5 Human Genetics and Cognitive Functions, University Paris Diderot, Sorbonne Paris Cité, Paris, France

23 6 Université de Rouen Normandie, UFR des Sciences et Techniques, Rouen, France

24 7 Lothian Birth Cohorts group, Department of Psychology, School of Philosophy, Psychology and Language Sciences, The University of  
25 Edinburgh, Edinburgh, EH8 9JZ, UK.

26 8 Medical Genetics Section, Centre for Genomic & Experimental Medicine, MRC Institute of Genetics & Molecular Medicine, University of  
27 Edinburgh, Western General Hospital, Edinburgh, EH4 2XU, UK.

28 9 Generation Scotland, Centre for Genomic and Experimental Medicine, University of Edinburgh, Edinburgh, EH4 2XU, UK.

29 10 Institute of Psychiatry, Psychology, and Neuroscience, King's College London, London, England

30 11 Department of Neurosciences, Human Genetics and Cognitive Functions, Institut Pasteur, Paris, France

31 12 Centre National de la Recherche Scientifique Genes, Synapses and Cognition Laboratory, Institut Pasteur, Paris, France

32 13 Human Genetics and Cognitive Functions, University Paris Diderot, Sorbonne Paris Cité, Paris, France

33 14 The Hospital for Sick Children, University of Toronto, Toronto, Ontario, Canada

34 15 Rotman Research Institute, Baycrest, Toronto, Ontario, Canada

35 16 Departments of Psychology and Psychiatry, University of Toronto, Toronto, Ontario, Canada

36 17 Child Mind Institute, New York, New York

37 18 Montreal Neurological Institute, McGill University, Montreal, QC, Canada.

38 19 McConnell Brain Imaging Center, McGill University, Montreal, QC, Canada

39 20 Douglas Mental Health University Institute, Montreal, QC, Canada

40 21 Psychology, Université de Montréal, Montreal, QC, Canada.

41 22 Department of Biomedical and Health Informatics, Children's Hospital of Philadelphia, Philadelphia, PA

42 23 Department of Psychiatry, Yale University School of Medicine, New Haven, CT, USA; Olin Neuropsychiatric Research Center, Institute of  
43 Living, Hartford Hospital, Hartford, CT, USA.

44 24 Gerald Bronfman Department of Oncology, Departments of Epidemiology, Biostatistics & Occupational Health and Human Genetics, McGill  
45 University, Montreal, Quebec, Canada

46  
47 **Corresponding authors:**

48  
49 Guillaume Huguet

50 Sainte Justine University Hospital

51 3175 chemin de la Côte-Sainte-Catherine,

52 Montréal, QC H3T 1C5

53 [guillaumeaf.huguet@gmail.com](mailto:guillaumeaf.huguet@gmail.com)

54  
55 Sébastien Jacquemont

56 Sainte Justine University Hospital

57 3175 chemin de la Côte-Sainte-Catherine,

58 Montréal, QC H3T 1C5

59 [sebastien.jacquemont@umontreal.ca](mailto:sebastien.jacquemont@umontreal.ca)

60 **ABSTRACT**

61 Genomic Copy Number Variants (CNVs) are routinely identified and reported back to patients  
62 with neuropsychiatric disorders, but their quantitative effects on essential traits such as cognitive  
63 ability are poorly documented. We have recently shown that the effect-size of deletions on  
64 cognitive ability can be statistically predicted using measures of intolerance to  
65 haploinsufficiency. However, the effect-sizes of duplications remain unknown. It is also  
66 unknown if the effect of multigenic CNVs are driven by a few genes intolerant to  
67 haploinsufficiency or distributed across tolerant genes as well.

68 Here, we identified all CNVs >50 kilobases in 24,092 individuals from unselected and autism  
69 cohorts with assessments of general intelligence. Statistical models used measures of intolerance  
70 to haploinsufficiency of genes included in CNVs to predict their effect-size on intelligence.  
71 Intolerant genes decrease general intelligence by 0.8 and 2.6 points of IQ when duplicated or  
72 deleted, respectively. Effect-sizes showed no heterogeneity across cohorts. Validation analyses  
73 demonstrated that models could predict CNV effect-sizes with 78% accuracy. Data on the  
74 inheritance of 27,766 CNVs showed that deletions and duplications with the same effect-size on  
75 intelligence occur *de novo* at the same frequency.

76 We estimated that around 10,000 intolerant and tolerant genes negatively affect intelligence when  
77 deleted, and less than 2% have large effect-sizes. Genes encompassed in CNVs were not enriched  
78 in any GOterms but gene regulation and brain expression were GOterms overrepresented in the  
79 intolerant subgroup. Such pervasive effects on cognition may be related to emergent properties of  
80 the genome not restricted to a limited number of biological pathways.

81

82 **Introduction**

83

84 Copy Number Variants (CNVs) are deletions or duplications larger than 1000 base pairs. The  
85 contribution of CNVs to the etiology of intellectual disability (ID)[1–3], autism[4–6] and  
86 schizophrenia[6–8] is well established. The interpretation of CNVs in research and medical  
87 diagnostics remains essentially binary: benign or pathogenic (contributing to mental illness)[9].  
88 The routine implementation of Chromosomal Micro-Arrays (CMAs) as a first-tier diagnostic test  
89 identifies “pathogenic” CNVs in 10 to 15 % of children with neurodevelopmental disorders  
90 (NDD)[10]. A binary interpretation is however of limited use because patients present a broad  
91 spectrum of cognitive symptoms ranging from severe ID to learning disabilities. The quantitative  
92 effects of CNVs are poorly documented even for important traits such as general intelligence. It  
93 may be available for the most frequently recurrent CNVs but data is often collected in patients  
94 ascertained in the clinic with a bias towards severely affected individuals, leading to potentially  
95 gross overestimation of effect size. Only two studies have been conducted in unselected  
96 populations [11, 12] showing reduced performance on cognitive test for 24 recurrent CNVs.  
97 However, recurrent CNVs only represent a very small fraction of the total amount of ultra-rare  
98 CNVs identified in the neurodevelopmental disorder clinic as well as in the general population.  
99  
100 Intelligence is a major trait assessed in the developmental pediatric and psychiatric clinic. There  
101 is a significant genetic correlation between intelligence and psychiatric disorders and cognitive  
102 impairments represent a major referral criterion to the NDD clinic. The heritability of general  
103 intelligence is estimated at around 50 to 80% [13]. The heritability of variants in linkage  
104 disequilibrium with common SNPs is estimated to be around 22.7%, with variants in poor linkage  
105 disequilibrium with SNPs, including rare CNVs, explaining 31.3% of the phenotypic variation in  
106 intelligence[14]. Two recent GWAS, have identified over 200 loci associated with intelligence  
107 and education[15, 16] , potentially implicating 1000 genes. The latter were largely non-

108 overlapping with genes previously linked to ID[15]. Contrary to SNPs, there is no ambiguity in  
109 the molecular interpretation of a fully deleted or duplicated gene, which invariably decreases or  
110 increases transcription respectively. Therefore, CNVs represent a powerful tool to map the effect-  
111 sizes of genes (altered by gene dosage) on human traits.

112 We have previously proposed a framework to estimate and predict the effect-size on intelligence  
113 of CNVs. We showed that linear models[17] using the sum of the “probability of being loss-of-  
114 function intolerant” (pLI) scores[18] of all genes included in a deletion can predict their effect-  
115 size on intelligence quotient (IQ) with 75% accuracy. Our initial study was underpowered to  
116 measure the effect-size of duplications. It is also unknown if only a limited number of intolerant  
117 genes or a large proportion of genes within CNVs are driving effects on cognitive abilities. More  
118 broadly, the number of genes modulating general intelligence remains unknown. The pLI used in  
119 our earlier model, ranges from 0 to 1 but has a bimodal distribution and is essentially a  
120 categorical variable classifying genes as intolerant ( $>0.9$ ) or tolerant ( $\leq 0.9$ ) to protein-loss-of-  
121 function (pLoF) [18]. Continuous measures such as the LOEUF[19] (Loss-of-function  
122 Observed/Expected Upper bound Fraction) were recently introduced to reflect the full spectrum  
123 of intolerance to pLoF. LOEUF range from 0 to 2, and values below 0.35 are suggestive of  
124 intolerance.

125 Our present aims were 1) to test the robustness of effect-size estimates for CNVs across  
126 unselected and NDD populations, 2) to establish the effect-size on general intelligence of  
127 genomic duplications, 3) to investigate the quantitative relationship between effect-size on  
128 general intelligence and the frequency of *de novo* events, and 4) to estimate individual effect-  
129 sizes for all protein-coding genes that are intolerant as well as tolerant to pLoF.

130 We identified CNVs in 24,092 individuals from five general populations, two autism cohorts and  
131 one neurodevelopmental cohort. Measures of intolerance to pLoF were used as variables to  
132 estimate the effect of CNVs and individual genes on general intelligence. Validation procedures

133 using cognitive data on CNVs from 47 published reports and the UKBB demonstrated a near  
134 80% accuracy of model estimated. We implemented an online tool to help clinicians and  
135 researchers estimate the effect-size of any CNVs on general intelligence.

136 **RESULTS**

137 1) Deletions and duplications have a 3:1 effect-size ratio on general intelligence

138 We first sought to replicate our previous estimates for the effect-size of deletions on  
139 general intelligence computed using pLI [17]. We performed a meta-analysis on 20,151  
140 individuals from 5 unselected populations (Table 1, Supplementary Fig. 1) showing that the  
141 deletion of one point of pLI decreases NVIQ or g-factor by 0.18 z-score (95% CI: -0.23 to -0.14,  
142 equivalent to 2.7 points of NVIQ, Fig. 1a, Supplementary Table 1). For duplications, we  
143 performed a meta-analysis using the same unselected populations. It shows that duplicating one  
144 point of pLI decreases NVIQ or g-factor by 0.04 z-score (95% CI: -0.09 to -0.01), which is  
145 equivalent to 0.75 points of IQ. Of notes, our previous study [17] was unable to estimate effect-  
146 sizes of duplications on general intelligence, likely due to sample size. There was no  
147 heterogeneity across cohorts. Sensitivity analyses showed that methods used for cognitive  
148 assessments did not influence these results (Fig. 1, Supplementary Table 2).

149

150 2) The effect-size of CNVs on general intelligence is not influenced by ascertainment.

151 Since genomic variants with large effects on general intelligence are thought to be removed  
152 from the general population as a result of negative selective pressure, this may have led to an  
153 underestimation of the effect-size of CNVs in unselected populations. To examine this  
154 possibility, we analyzed 3,941 individuals (Table 1, Supplementary Fig. 1) from two autism  
155 cohorts, which include individuals with ID and *de novo* CNVs. Effect-sizes of pLI on general  
156 intelligence were the same than those observed in unselected populations for deletions and  
157 duplications and we did not observe any heterogeneity across cohorts (Fig. 1, Supplementary  
158 Table 1). Finally, we asked if effect-sizes of pLI were the same in large CNVs rarely observed in  
159 the general population or in autism cohorts. We tested 226 CNV carriers and 325 intrafamilial  
160 controls from 132 families ascertained in the clinic (Table 1). Effect-sizes of pLI on IQ were very

161 similar with a decrease of 0.147 z-score, 95% CI: -0.18 to -0.11 ( $P= 1.1\times 10^{-15}$ ) in deletions and  
162 0.069 z-score, 95% CI: -0.1 to -0.04 ( $P=8.7\times 10^{-6}$ ) in duplications (Supplementary Table 3).

163

### 164 3) Mega-analysis suggests additive effects of constraint scores on general intelligence

165 We pooled samples after adjusting for variables including cognitive test and cohorts to perform a  
166 mega-analysis of 24,092 individuals carrying 13,001 deletions and 15,856 duplications  
167 encompassing 36% of the coding genome (Fig. 1b, Supplementary Fig. 2a). The effect-size of  
168 pLI was unchanged, decreasing general intelligence by 0.175 z-score ( $SE=0.016$ ,  $P=1.25\times 10^{-28}$ )  
169 and 0.054 z-score ( $SE=0.009$ ,  $P=1.90\times 10^{-9}$ ) for deletions and duplications, respectively  
170 (Supplementary Table 4). The partial  $R^2$  shows that deletions and duplications measured by pLI  
171 explain respectively 0.5% and 0.1% of the total variance of intelligence in the complete dataset;  
172 in line with the fact that large effect-size CNVs are rare in the general population.

173 Among 11 variables, the 2 main constraint scores (pLI and 1/LOEUF) best explained (based on  
174 AIC) the variance of general intelligence (Supplementary Table 4). For the remainder of the  
175 study, we transitioned to using LOEUF because it is a continuous variable (the pLI is essentially  
176 binary) and is now recommended as the primary constraint score by gnomAD. Analyses using  
177 pLI are presented in supplemental results.

178 There was no interaction between constraint scores and age or sex (Supplementary Table 5 to 8).  
179 Non-linear models did not improve model fit (Supplementary Table 9 to 10), suggesting an  
180 additive effect of constraint scores.

181

### 182 4) The effect-size of 1/LOEUF on intelligence is the same in recurrent neuropsychiatric 183 CNVs and non-recurrent CNVs

184 We show that removing 608 individuals carrying any of the 121 recurrent CNV previously  
185 associated with neuropsychiatric conditions [17] does not influence the effect-size of 1/LOEUF

186 on general intelligence (Supplementary Table 11). It has been posited that the deleteriousness of  
187 large psychiatric CNVs may be due to interactions between genes encompassed in CNVs. We  
188 therefore asked if the effect-size of 1/LOEUF is the same for CNVs encompassing small and  
189 large numbers of genes. We recomputed the linear model 6 times after incrementally excluding  
190 individuals with a total sum of  $1/\text{LOEUF} \geq 60, 40, 20, 10, 4$  and  $2.85$  for deletions and  
191 duplications separately. Effect-sizes remain similar whether deletions encompass  $>10$  or  $>60$   
192 points of 1/LOEUF (Fig. 1d, Supplementary Fig. 2b).

### 193 5) Gene dosage of 1% of coding genes shows extreme effect-size on general intelligence.

194 Our ability to estimate large effect sizes is likely hampered by the explanatory variable  
195 (1/LOEUF) used in the model because there is only a 60-fold difference between the smallest and  
196 largest value. To improve model accuracy for large effect-size genes, we used a list of 256 ID-  
197 genes[2, 20], previously identified with an excess of *de novo* mutations in NDD cohorts. We  
198 identified 126 CNVs encompassing at least one ID-gene (Fig. 2).

199 We recomputed the model by integrating 4 explanatory variables: the sum of 1/LOEUF for ID  
200 and non-ID-genes encompassed in deletions and duplications. The effect-size on intelligence of  
201 1/LOEUF for ID-genes was 7 to 11-fold higher than the effect-size of non-ID genes which  
202 remained unchanged (Supplementary Table 12, 13 and Fig. 3). The mean effect of ID-genes  
203 intolerant to pLoF ( $\text{LOEUF} < 0.35$ ) was a decrease of 20 points of IQ for deletions and 9 points for  
204 duplications (Supplementary Table 13).

205

### 206 6) Model explains nearly 80% of the effect-size of CNVs.

207 As a validation procedure, we compared model estimates to published observations for 47  
208 recurrent CNVs reported in clinical series and in the UKBB<sup>17</sup> (Supplementary Table 14 and 15).  
209 When cognitive data was available from both clinical and the UKBB ( $n=13$ ), we used the mean  
210 of both effect-sizes. Concordance between model estimates and previously published measures



211 was 0.78 for all CNVs (95% CI, 0.66-0.86,  $P= 4.3\times 10^{-11}$ , Fig. 4). Accuracy was similar for  
212 deletions (ICC=0.71 [0.5;0.84],  $P= 1.8\times 10^{-5}$ ) and duplications (ICC=0.85 [0.7;0.93],  $P= 3\times 10^{-7}$ )  
213 as well as for small and large CNVs including trisomy 21 (Fig. 3a and 3b, Supplementary Fig. 5).

214

#### 215 7) CNVs with the same impact on intelligence have the same *de novo* frequency.

216 Because measures of intolerance to haploinsufficiency explain equally well the effect-sizes of  
217 deletions and duplications on intelligence, we investigated the relationship between effects on  
218 intelligence and *de novo* frequency for deletions and duplications. We established inheritance for  
219 26,437 CNVs in 6 cohorts (Supplementary Table 16). There was a strong relationship between  
220 effects on general intelligence estimated by the model and the frequency of *de novo* observations  
221 for deletions ( $P=1.9\times 10^{-65}$ ) and duplications ( $P=4.6\times 10^{-24}$ , Fig. 3c).

222 Deletions and duplications with the same impact on general intelligence show similar *de novo*  
223 frequency CNVs (Fig. 3c).

224 The concordance between the probability of occurring *de novo* estimated by the model (after  
225 removing recurrent CNVs) and *de novo* frequency reported in the DECIPHER database on 31  
226 recurrent CNVs was 0.81 ([0.67-0.9];  $P=8.2\times 10^{-8}$ ) (Fig. 3d, Supplementary Table 17 and Fig. 6).

227

#### 228 8) Estimating effect-sizes of individual genes using LOEUF

229 Since we were underpowered to perform a gene-based GWAS, we first divided all genes in 4  
230 categories: highly intolerant genes (LOEUF<0.2; n=980), moderately intolerant genes  
231 ( $0.2\leq\text{LOEUF}<0.35$  n=1,762), tolerant genes ( $0.35\leq\text{LOEUF}<1$ ; n=7,442) and highly tolerant  
232 genes (LOEUF $\geq 1$ ; n=8,267). This dichotomization of LOEUF values also allowed to test whether  
233 the previous linear models were driven by subgroups of genes. The sum of genes in each category  
234 was used as four explanatory variables to explain general intelligence in the same linear model.

235 For deletions, highly, moderately intolerant and tolerant genes showed negative effects on

236 general intelligence (Fig. 4a, Supplementary Table 18). For duplications only moderately  
237 intolerant genes showed negative effects (Supplementary Fig. 7 and Table 18).  
238 We were underpowered to further subdivide these LOEUF categories, so we tested 38  
239 overlapping LOEUF categories in 38 linear models. Each model used 2 explanatory variables:  
240 number of genes within and outside the LOEUF category (size = 0.15 LOEUF). For  
241 haploinsufficiency, negative effects on general intelligence were observed for genes within 13  
242 categories across intolerant and tolerant LOEUF values. For duplications, only 2 categories had  
243 negative effects (Fig. 4a, Supplementary Fig.7 and Table 19).

244

#### 245 9) Most biological functions affect cognition.

246 The 6,114 different genes encompassed in the CNVs of our dataset did not show any GOterm  
247 enrichment except for olfactory related terms (Supplementary Tables 20). We asked if intolerant  
248 ( $LOEUF < 0.35$ ) and tolerant genes ( $0.35 < LOEUF < 1$ ), which negatively affect IQ in the analysis  
249 above were enriched in GOterms. All intolerant and tolerant genes genome-wide, were enriched  
250 in 365 and 30 GOterms respectively (Fig. 4b, Supplementary Tables 21, 22). The largest group of  
251 GOterms enriched in intolerant genes represented gene regulation (RNA polymerase II  
252 transcription factor activity, chromatin organization; Fig. S11), cell death regulation and neuronal  
253 function (dendrite and synapse). Among 23 tissues overrepresented in intolerant genes, adult  
254 brain and epithelium showed the strongest enrichment (Supplementary Table 21). Top enriched  
255 pathways included those in cancer, focal adhesion, Wnt signaling and MAPK (Supplementary  
256 Table 21). For tolerant genes, milder enrichments included translation (tRNA) and cytoskeletal  
257 structure. Among the 7 significant tissues adult brain showed the strongest enrichment (Fig. 4b,  
258 Supplementary Table 22 and Fig. 12). The 2,862 intolerant and tolerant genes encompassed in the  
259 CNVs of our dataset showed the same GOterm distribution observed above for the full intolerant  
260 and tolerant coding genome. Genes encompassed in CNVs were therefore represented well all

261 molecular functions observed for each LOEUF group at the genome-wide level (Supplementary  
262 Table 23).

263

## 264 **DISCUSSION**

265 Deletions and duplications have effect-sizes on cognitive ability that are robust across cohorts,  
266 clinical diagnoses, and general intelligence assessments. The effect-size ratio on cognitive ability  
267 of deletions to duplications is 3:1. The linear sum of pLI or 1/LOEUF predicted the effect-size on  
268 intelligence of deletions and duplications with equal accuracy (78%). Using categories of LOEUF  
269 values, we provide the first estimates for the individual effect-sizes of protein-coding genes,  
270 suggesting that half of the coding genome affects intelligence. The 2,862 genes encompassed in  
271 CNVs of our dataset show the same GOterm distribution observed in the intolerant and tolerant  
272 coding genome.

273

### 274 [Model validation and ascertainment biases](#)

275 Models show 78% concordance with effect-size of CNVs on IQ from previous literature reports.  
276 Estimates are discordant for several CNVs, which may be due to either 1) unidentified large  
277 effect-size genes with unreliable LOEUF measures due to the small size of the protein coding  
278 region, and 2) ascertainment bias. However, biases from clinically referred individuals can be  
279 adjusted for using intrafamilial controls [21, 22]. This is confirmed by effect-sizes using the Ste  
280 Justine family genetic cohort. Also, our results suggest that the effect-size of pathogenic CNVs  
281 are underestimated in the UKBB[21] while those of small CNVs are largely overestimated in  
282 clinical series. The maximum effect size measured in UKBB was only 0.4 z-score including  
283 pathogenic CNVs such as 16p11.2, 2q11.2 deletions and 10q11.21-q11.23 deletion containing an  
284 ID-gene (*WDFY4*). On the other hand, the effect size of variants such as the 16p13.11  
285 duplications and 1q21.1 CNVs are likely overestimated in clinical series[23]. Therefore,  
286 statistical models using a variety of disease and unselected cohorts are likely to provide the most  
287 accurate estimates. Surprisingly, an autism diagnosis is not associated with a different impact of  
288 CNVs on cognitive ability. A recent study characterizes this finding showing that CNVs similarly

289 decrease IQ in autism and in unselected populations but are nevertheless more frequent in autism  
290 than in controls with same intelligence[24].

291

### 292 [Individual effect-sizes of genes, and go their GOterm enrichments](#)

293 Our study is based on CNVs encompassing intolerant and tolerant genes with the same GOterm  
294 distribution observed in those LOEUF categories genome-wide. Only one percent of coding  
295 genes with the highest intolerance to pLoF has large effects on cognitive ability (20 and 9 IQ  
296 points for deletions and duplications of ID genes). The rest of the intolerant genes (15% of coding  
297 genes) have moderate to mild effect-sizes. The group of all intolerant genes is enriched in many  
298 GOterms including brain expression and gene regulation as previously reported for this group[2,  
299 25]. Genes considered tolerant to pLoF ( $0.35 < \text{LOEUF} < 1$ ; 40% of coding genes) impact  
300 intelligence with small effect-size and are only mildly enriched in GOterms. This is reminiscent  
301 of GWAS results for schizophrenia showing that most GOterms contribute to it's heritability  
302 [26].

303

### 304 [Potential clinical application](#)

305 Models developed in this study provide a translation of gnomAD constraint scores into cognitive  
306 effect-sizes. Model outputs are implemented in a prediction tool (<https://cnvprediction.urca.ca/>),  
307 which is designed to estimate the population-average effect-size of any given CNV on general  
308 intelligence, not the cognitive ability of the individual who carries the CNV. If the cognitive  
309 deficits of an individual are concordant with the effect-size of the CNV they carry, one may  
310 conclude that the CNV contributes substantially to those deficits. When discordant (ie. The ob-  
311 served IQ drop is  $\geq 15$  points (1SD) larger than the model estimate), the clinician may conclude  
312 that a substantial proportion of the contribution lies in additional factors which should be  
313 investigated, such as additional genetic variants and perinatal adverse events (e.g. neonatal

314 hypoxic ischemic injury, seizure disorders etc). If IQ cannot be reliably measured (ie.  $\leq 4$  years or  
315 in the case of severe behavioral disorders), the cognitive impact of the CNV predicted by the  
316 model may allow to anticipate the need for potential interventions. Overall, the output of this tool  
317 can help interpret CNVs in the clinic, but estimates should be interpreted with caution. The model  
318 can provide an estimate for the effect size on intelligence of individual genes when deleted.  
319 Therefore, one may use this information to estimate the effect size on intelligence of any SNV  
320 resulting in a loss of function. However, larger datasets are required to refine the estimates for  
321 individual gene.

322

### 323 [The relationship between genetic fitness and cognitive abilities](#)

324 The reasons underlying the tight relationship between general intelligence and epidemiological  
325 measures of intolerance to pLoF, is unclear. This relationship is further highlighted by the fact  
326 that deletions and duplications with the similar impact on intelligence occur *de novo* with similar  
327 frequencies. Behavioral interpretations are intuitive for severe ID but do not apply for CNVs with  
328 much milder effects. In other words, individuals with moderate or severe ID have limited  
329 offspring due to behavioral deficits but it is unclear how small changes in intelligence may lead  
330 to behavioral issues resulting in decreased fitness. Our results also suggest that genes considered  
331 as “tolerant” with LOEUF  $< 1$  affect cognitive abilities and are likely under “mild constraint”.  
332 Larger samples are required to better characterize the effect of this broad category of “mildly  
333 intolerant” genes on cognitive ability.

334

### 335 [Limitations](#)

336 The model relies on constraint scores (LOEUF or pLI), which are epidemiological measures of  
337 genetic fitness in human populations, without any consideration of gene function [18, 19]. It is  
338 likely that some genes decrease fitness (eg. genes involved in fertility) without affecting general

339 intelligence. Further studies combining intolerance scores with functional categories are required  
340 to investigate this question. While LOEUF was designed to measure intolerance to loss of  
341 function, we used it to assess both deletions and duplications. However, our results and a recent  
342 report suggest that it also measures the intolerance to increased gene expression [27]. Noise in  
343 the model may be related to unreliable constraint scores computed for small genes with a limited  
344 number of pLoF variants observed in the gnomAD database. Bias in the model may be  
345 introduced by ID genes observed in our dataset. Indeed, they may reflect a less severe subgroup  
346 and model outputs should be interpreted with caution when CNVs encompass ID-genes. Another  
347 potential bias is related to the fact that models were trained on CNVs encompassing 36% of the  
348 coding genome. Projections suggest that 500K individuals from an unselected population would  
349 cover 78% (Fig. S8).

350 Finally, all models imply additive effects and massive datasets would be required to test for gene-  
351 gene and gene-environment interactions. However, the fact that very large CNVs (such as trisomy  
352 21) are accurately estimated by the model suggests that genetic interactions within large genomic  
353 segments or even chromosomes cannot be readily observed. There is long standing discordance  
354 between observations made at the microscopic and macroscopic level. Indeed, molecular studies  
355 provide unequivocal evidence that gene-gene interactions are common but quantitative genetic  
356 theory suggests that contributions from non-additive effects to phenotypic variation in the  
357 population are small. Reconciling these two observations, polygenic models assume that  
358 interactions are the rule rather than the exception. Interactions are, in fact, accounted for in the  
359 additive models[28]. For example, LOEUF values are correlated with the number of protein-  
360 protein interactions[19] and our results also show that the intolerant genes are enriched in  
361 GOterms linked to “gene regulation”. In other words, the level of interactions for a given gene is  
362 directly related to its “individual” effect size on intelligence (ie. chromatin remodelers have a  
363 very broad interaction network, low LOEUF values and high effect sizes on intelligence).

364

365 **Conclusions**

366 The effect-size of deletions or duplications on intelligence can be accurately estimated with  
367 additive models using constraint scores. The same relationship between gene dosage and  
368 cognition apply to small benign CNVs as well as extreme CNVs such as Down syndrome. We  
369 provide a map of effect-sizes at the individual gene level but to move beyond this rough outline,  
370 much larger sample sizes are required. Nonetheless, these results suggest that a large proportion  
371 (56%) of the coding genome covering all molecular functions influences cognitive abilities. One  
372 may therefore view the genetic contribution to cognitive difference as an emergent property of  
373 the entire genome not restricted to a limited number of biological pathways.



## 374 Materials and Methods

### 375 1. Cohorts

376 We included five cohorts from the general population, two autism cohorts and one familial cohort  
377 with at least one CNV-carrier child recruited for a neurodevelopmental disorder (Table1). Studies  
378 for each cohort were reviewed by local institutional review boards. Parents/guardians and adult  
379 participants gave written informed consent and minors gave assent.

### 380 2. Measures of general intelligence

381 General intelligence was assessed using the neurocognitive tests detailed in table 1. Measures of  
382 non-verbal intelligence quotient (NVIQ) were available in five cohorts and general intelligence  
383 factor (g-factor)[29] was computed in four cohorts, based on cognitive tests, primarily assessing  
384 fluid non-verbal reasoning (Table1, Supplementary Fig. 1). Intelligence measures were  
385 normalized using z-score transformations to render them comparable. The concordance between  
386 z-scored NVIQ and g-factor available for three cohorts ranged from 60 to 77% (Supplementary  
387 Table 24).

### 388 3. Genetic information

#### 389 CNV calling and filtering

390 For all SNP array data, we called CNVs with PennCNV and QuantiSNP using previously  
391 published methods [17]. For the MSSNG dataset[30], we used CNVs called on whole genome  
392 sequencing by Trost *et al.* [31].

393 CNV filtering steps were previously published (Supplemental material). For the mega-analysis,  
394 we applied an additional filtering criterion, selecting CNVs encompassing at least 10 probes for  
395 all array technologies used across all cohorts.

396 The Sainte-Justine CNV-family cohort included participants on the basis of one pathogenic CNV  
397 identified in the diagnostic cytogenetic laboratory using an Agilent 180K array.

#### 398 Annotation of CNVs

399 We annotated the CNVs using Gencode V19 (hg19) with ENSEMBL  
400 (<https://grch37.ensembl.org/index.html>). Genes with all transcripts fully encompassed in CNVs  
401 were annotated using 12 variables present in previous article[17]. Non-coding regions were  
402 annotated with the number of expression quantitative trait loci (eQTLs) regulating genes  
403 expressed in the brain[32]. CNV scores were derived by summing all scores of genes within  
404 CNVs.[17]. Also, we used a list of 256 ID-genes[2, 20], previously identified with an excess of  
405 *de-novo* mutations in NDD cohorts.

406

#### 407 4. Statistical analyses

##### 408 Modelling the effect of CNVs on intelligence

409 General intelligence was adjusted within each cohort for age and sex when required ( $Z_{adj\ Intell.}$ ;  
410 see supplemental material and Supplementary Fig. 9 and 10). To estimate the effect of CNVs on  
411 general intelligence, we fit the model developed by Huguet et al. [17] where the sum of pLI (or  
412 any of the 10 other scores) for all genes encompassed in deletions or duplications, respectively, is  
413 the variable used to predict the adjusted Z-score of general intelligence:

$$414 \quad \text{Model for deletion } (\mathcal{M}1_{DEL}): Z_{adj\ intell.} \sim \beta_{0,DEL} + \beta_{1,DEL} \times \sum_{gene} pLI$$

415 where  $\beta_{0,DEL}$ ,  $\beta_{1,DEL}$  are the regression coefficients. The same model was applied to duplications.

416 First, models  $\mathcal{M}1_{DEL}$  and  $\mathcal{M}1_{DUP}$  were fitted independently and adjusted for each cohort and  
417 results were used in the meta-analyses. Second, in the mega-analysis,  $\mathcal{M}1_{DEL}$  and  $\mathcal{M}1_{DUP}$  were  
418 fitted after pooling all samples and adjusting on the type of cognitive measure and cohort.

419 To take into account ID-genes that have a greater impact on intelligence, we used a model  
420 including 4 predictive variables ( $\mathcal{M}2$ ):

$$Z_{adj\ intell.} \sim \beta_0 + \beta_1 \times \sum_{ID\ gene\ in\ deletion} \frac{1}{LOEUF} + \beta_2 \times \sum_{ID\ gene\ in\ duplication} \frac{1}{LOEUF} + \beta_3 \\ \times \sum_{non-ID\ gene\ in\ deletion} \frac{1}{LOEUF} + \beta_4 \times \sum_{non-ID\ gene\ in\ duplication} \frac{1}{LOEUF}$$

421 where  $\beta_0$ ,  $\beta_1$ ,  $\beta_2$ ,  $\beta_3$  and  $\beta_4$  are the regression coefficients.

422 The variance explained by deletions and duplications (measured by pLI) was computed using  
423 partial  $R^2$  in the full dataset as well as the subgroup (n=14,874) of unrelated individuals.

#### 424 Sensitivity analyses

425 We tested non-linearity of the effect of haploinsufficiency scores on general intelligence by using  
426 polynomial regression model and by exploring a smooth function of the effect of  
427 haploinsufficiency scores using a Gaussian kernel regression method ([https://cran.r-](https://cran.r-project.org/web/packages/KSPM/index.html)  
428 [project.org/web/packages/KSPM/index.html](https://cran.r-project.org/web/packages/KSPM/index.html)) flexible enough to account for various types of  
429 effects (Supplementary material).

#### 430 Model Validation

431 To validate our models, we computed the concordance between model predictions and loss of IQ  
432 measured for 47 recurrent CNVs obtained in previous publications (supplementary material). The  
433 concordance was computed using the intraclass coefficient correlation of type (3,1) ( $ICC_{(3,1)}$ )  
434 [33].

#### 435 Modelling the probability to be de novo

436 We performed logistic regressions to estimate the probability of a CNV being *de novo* ( $P_{de\ novo}$ )  
437 as a function of the haploinsufficiency scores:

438

439 Model for deletions ( $\mathcal{M}3_{DEL}$ ):

$$\text{logit}(P_{de\ novo}) \sim \beta_{0,DEL} + \beta_{1,DEL} \times Z_{adj\ intell.\ estimated\ by\ M2\ deletion}.$$

440 where  $\beta_{0,DEL}$ ,  $\beta_{1,DEL}$  are the regression coefficients. The same model was applied to duplications  
441 ( $\mathcal{M}3_{DUP}$ )

442 For these analyses, we added two clinical populations (Decipher, decipher.sanger.ac.uk/) and the  
443 cytogenetic database of Sainte-Justine Hospital, where genetic data could be compared between  
444 the child and their parents, and applied the same filtering as for the previous CNV selection  
445 leading to a total of 26,437 CNVs. (Supplementary Table 16). The binary outcome variable was  
446 the type of transmission (1=*de novo*, 0=inherited).

447 To validate these models, we computed the concordance between model estimates and percentage  
448 of *de novo* variants computed with Decipher for 27 recurrent CNVs.

#### 449 Estimating the effect-size of individual genes based on LOEUF values

450 We used 4 categories of LOEUF values to estimate the effect-size of genes classified as highly  
451 intolerant ( $LOEUF < 0.2$ ,  $n=980$ ), moderately intolerant ( $0.2 \leq LOEUF < 0.35$ ,  $n=1,762$ ), tolerant  
452 ( $0.35 \leq LOEUF < 1$ ,  $n=7,442$ ), and highly tolerant to haploinsufficiency ( $LOEUF \geq 1$ ,  $n=8,267$ ). For  
453 deletions, model 4 is as follow:

454 ( $\mathcal{M}4_{del}$ ):

$$Z_{adj\ intell.} \sim \beta_0 + \beta_1 \times \sum (\text{highly intolerant genes } i) + \beta_2 \times \sum (\text{moderately intolerant genes } i) \\ + \beta_3 \times \sum (\text{tolerant genes } i) + \beta_4 \times \sum (\text{highly tolerant genes } i)$$

455 where  $\beta_{0,CNV\ type}$ ,  $\beta_{1,CNV\ type}$ ,  $\beta_{2,CNV\ type}$ ,  $\beta_{3,CNV\ type}$  and  $\beta_{4,CNV\ type}$  are the regression  
456 coefficients. The same model was applied for duplications.

457 To explore smaller categories of LOEUF values, we slid a window of size 0.15 LOEUF units, in  
458 increments of 0.05 units thereby creating 38 categories across the range of LOEUF values. We  
459 performed 38 linear models:

460 ( $\mathcal{M}5_{del}$ ):

$$Z_{\text{adj intell.}} \sim \beta_{0, \text{CNV type}} + \beta_{1, \text{CNV type}} \times \sum (\text{genes } i \text{ inside the window}) \\ + \beta_{2, \text{CNV type}} \times \sum (\text{genes } i \text{ outside the window})$$

461 where  $\beta_{0, \text{CNV type}}$ ,  $\beta_{1, \text{CNV type}}$  and  $\beta_{2, \text{CNV type}}$  are the regression coefficients.

462 The same models were performed for duplications. Estimates were corrected for multiple testing

463 (38 tests) using FDR.

#### 464 GOterms Enrichment

465 For the GOterms enrichment for the tolerant and intolerant genes with all a genome and CNVs

466 between unselected, ASD and both populations, we used DAVID release 6.8[34] (<https://david->

467 [d.ncifcrf.gov](https://david-ncifcrf.gov)). We kept the defaults parameters and save only the terms with Bonferroni

468 corrected p-values <0.05. We then passed the list to REVIGO[35] (<http://revigo.irb.hr/>) to

469 summarize and group the redundant GO.

470

471

472 **REFERENCES**

473

- 474 1. Coe BP, Witherspoon K, Rosenfeld JA, van Bon BWM, Vulto-van Silfhout AT, Bosco P,  
475 et al. Refining analyses of copy number variation identifies specific genes associated with  
476 developmental delay. *Nat Genet.* 2014;46:1063–1071.
- 477 2. Coe BP, Stessman HAF, Sulovari A, Geisheker MR, Bakken TE, Lake AM, et al.  
478 Neurodevelopmental disease genes implicated by de novo mutation and copy number variation  
479 morbidity. *Nat Genet.* 2019;51:106–116.
- 480 3. Wilfert AB, Sulovari A, Turner TN, Coe BP, Eichler EE. Recurrent de novo mutations in  
481 neurodevelopmental disorders: properties and clinical implications. *Genome Med.* 2017;9.
- 482 4. Huguet G, Ey E, Bourgeron T. The genetic landscapes of autism spectrum disorders.  
483 *Annu Rev Genomics Hum Genet.* 2013;14:191–213.
- 484 5. Pinto D, Delaby E, Merico D, Barbosa M, Merikangas A, Klei L, et al. Convergence of  
485 Genes and Cellular Pathways Dysregulated in Autism Spectrum Disorders. *Am J Hum Genet.*  
486 2014;94:677–694.
- 487 6. Maillard AM, Ruef A, Pizzagalli F, Migliavacca E, Hippolyte L, Adaszewski S, et al. The  
488 16p11.2 locus modulates brain structures common to autism, schizophrenia and obesity. *Mol*  
489 *Psychiatry.* 2015;20:140–147.
- 490 7. Sakai M, Watanabe Y, Someya T, Araki K, Shibuya M, Niizato K, et al. Assessment of  
491 copy number variations in the brain genome of schizophrenia patients. *Mol Cytogenet.* 2015;8.
- 492 8. Szatkiewicz JP, O’Dushlaine C, Chen G, Chambert K, Moran JL, Neale BM, et al. Copy  
493 number variation in schizophrenia in Sweden. *Mol Psychiatry.* 2014;19:762–773.
- 494 9. Riggs ER, Andersen EF, Cherry AM, Kantarci S, Kearney H, Patel A, et al. Technical  
495 standards for the interpretation and reporting of constitutional copy-number variants: a joint  
496 consensus recommendation of the American College of Medical Genetics and Genomics  
497 (ACMG) and the Clinical Genome Resource (ClinGen). *Genet Med.* 2019:1–13.
- 498 10. Miller DT, Adam MP, Aradhya S, Biesecker LG, Brothman AR, Carter NP, et al.  
499 Consensus Statement: Chromosomal Microarray Is a First-Tier Clinical Diagnostic Test for  
500 Individuals with Developmental Disabilities or Congenital Anomalies. *Am J Hum Genet.*  
501 2010;86:749–764.
- 502 11. Kendall KM, Bracher-Smith M, Fitzpatrick H, Lynham A, Rees E, Escott-Price V, et al.  
503 Cognitive performance and functional outcomes of carriers of pathogenic copy number variants:  
504 analysis of the UK Biobank. *Br J Psychiatry.* 2019;214:297–304.
- 505 12. Stefansson H, Meyer-Lindenberg A, Steinberg S, Magnusdottir B, Morgen K,  
506 Arnarsdottir S, et al. CNVs conferring risk of autism or schizophrenia affect cognition in  
507 controls. *Nature.* 2014;505:361–366.
- 508 13. Posthuma D, de Geus EJC, Boomsma DI. Perceptual Speed and IQ Are Associated  
509 Through Common Genetic Factors. *Behav Genet.* 2001;31:593–602.
- 510 14. Hill WD, Arslan RC, Xia C, Luciano M, Amador C, Navarro P, et al. Genomic analysis of  
511 family data reveals additional genetic effects on intelligence and personality. *Mol Psychiatry.*  
512 2018;23:2347–2362.
- 513 15. Savage JE, Jansen PR, Stringer S, Watanabe K, Bryois J, de Leeuw CA, et al. Genome-  
514 wide association meta-analysis in 269,867 individuals identifies new genetic and functional links  
515 to intelligence. *Nat Genet.* 2018;50:912–919.
- 516 16. Hill WD, Marioni RE, Maghazian O, Ritchie SJ, Hagenaars SP, McIntosh AM, et al. A  
517 combined analysis of genetically correlated traits identifies 187 loci and a role for neurogenesis  
518 and myelination in intelligence. *Mol Psychiatry.* 2019;24:169–181.
- 519 17. Huguet G, Schramm C, Douard E, Jiang L, Labbe A, Tihy F, et al. Measuring and  
520 Estimating the Effect Sizes of Copy Number Variants on General Intelligence in Community-

- 521 Based Samples. *JAMA Psychiatry*. 2018;75:447–457.
- 522 18. Lek M, Karczewski KJ, Minikel EV, Samocha KE, Banks E, Fennell T, et al. Analysis of  
523 protein-coding genetic variation in 60,706 humans. *Nature*. 2016;536:285–291.
- 524 19. Karczewski KJ, Francioli LC, Tiao G, Cummings BB, Alföldi J, Wang Q, et al. Variation  
525 across 141,456 human exomes and genomes reveals the spectrum of loss-of-function intolerance  
526 across human protein-coding genes. *BioRxiv*. 2019:531210.
- 527 20. McRae JF, Clayton S, Fitzgerald TW, Kaplanis J, Prigmore E, Rajan D, et al. Prevalence  
528 and architecture of de novo mutations in developmental disorders. *Nature*. 2017;542:433–438.
- 529 21. D’Angelo D, Lebon S, Chen Q, Martin-Brevet S, Snyder LG, Hippolyte L, et al. Defining  
530 the Effect of the 16p11.2 Duplication on Cognition, Behavior, and Medical Comorbidities.  
531 *JAMA Psychiatry*. 2016;73:20–30.
- 532 22. Moreno-De-Luca A, Evans DW, Boomer KB, Hanson E, Bernier R, Goin-Kochel RP, et  
533 al. The Role of Parental Cognitive, Behavioral, and Motor Profiles in Clinical Variability in  
534 Individuals With Chromosome 16p11.2 Deletions. *JAMA Psychiatry*. 2015;72:119–126.
- 535 23. Bernier R, Steinman KJ, Reilly B, Wallace AS, Sherr EH, Pojman N, et al. Clinical  
536 phenotype of the recurrent 1q21.1 copy-number variant. *Genet Med*. 2016;18:341–349.
- 537 24. Douard E, Zeribi A, Schramm C, Tamer P, Loum MA, Nowak S, et al. Effect Sizes of  
538 Deletions and Duplications on Autism Risk Across the Genome. *Am J Psychiatry*.  
539 2020:appi.ajp.2020.19080834.
- 540 25. Satterstrom FK, Kosmicki JA, Wang J, Breen MS, De Rubeis S, An J-Y, et al. Large-  
541 Scale Exome Sequencing Study Implicates Both Developmental and Functional Changes in the  
542 Neurobiology of Autism. *Cell*. 2020;180:568-584.e23.
- 543 26. Boyle EA, Li YI, Pritchard JK. An expanded view of complex traits: from polygenic to  
544 omnigenic. *Cell*. 2017;169:1177–1186.
- 545 27. An open resource of structural variation for medical and population genetics | *bioRxiv*.  
546 <https://www.biorxiv.org/content/10.1101/578674v1.full>. Accessed 31 December 2019.
- 547 28. Wray NR, Wijmenga C, Sullivan PF, Yang J, Visscher PM. Common Disease Is More  
548 Complex Than Implied by the Core Gene Omnigenic Model. *Cell*. 2018;173:1573–1580.
- 549 29. Deary IJ. Intelligence. *Annu Rev Psychol*. 2011;63:453–482.
- 550 30. Yuen RKC, Merico D, Bookman M, Howe JL, Thiruvahindrapuram B, Patel RV, et al.  
551 Whole genome sequencing resource identifies 18 new candidate genes for autism spectrum  
552 disorder. *Nat Neurosci*. 2017;20:602–611.
- 553 31. Trost B, Walker S, Wang Z, Thiruvahindrapuram B, MacDonald JR, Sung WWL, et al. A  
554 Comprehensive Workflow for Read Depth-Based Identification of Copy-Number Variation from  
555 Whole-Genome Sequence Data. *Am J Hum Genet*. 2018;102:142–155.
- 556 32. Ramasamy A, Trabzuni D, Guelfi S, Varghese V, Smith C, Walker R, et al. Genetic  
557 variability in the regulation of gene expression in ten regions of the human brain. *Nat Neurosci*.  
558 2014;17:1418–1428.
- 559 33. Shrout PE, Fleiss JL. Intraclass correlations: uses in assessing rater reliability. *Psychol*  
560 *Bull*. 1979;86:420–428.
- 561 34. Huang DW, Sherman BT, Lempicki RA. Systematic and integrative analysis of large gene  
562 lists using DAVID bioinformatics resources. *Nat Protoc*. 2009;4:44–57.
- 563 35. Supek F, Bošnjak M, Škunca N, Šmuc T. REVIGO Summarizes and Visualizes Long  
564 Lists of Gene Ontology Terms. *PLOS ONE*. 2011;6:e21800.
- 565 36. Schumann G, Loth E, Banaschewski T, Barbot A, Barker G, Büchel C, et al. The  
566 IMAGEN study: reinforcement-related behaviour in normal brain function and psychopathology.  
567 *Mol Psychiatry*. 2010;15:1128–1139.
- 568 37. Pausova Z, Paus T, Abrahamowicz M, Bernard M, Gaudet D, Leonard G, et al. Cohort  
569 Profile: The Saguenay Youth Study (SYS). *Int J Epidemiol*. 2017;46:e19.
- 570 38. Deary IJ, Gow AJ, Pattie A, Starr JM. Cohort Profile: The Lothian Birth Cohorts of 1921

- 571 and 1936. *Int J Epidemiol.* 2012;41:1576–1584.
- 572 39. Awadalla P, Boileau C, Payette Y, Idaghdour Y, Goulet J-P, Knoppers B, et al. Cohort  
573 profile of the CARTaGENE study: Quebec’s population-based biobank for public health and  
574 personalized genomics. *Int J Epidemiol.* 2013;42:1285–1299.
- 575 40. Smith BH, Campbell A, Linksted P, Fitzpatrick B, Jackson C, Kerr SM, et al. Cohort  
576 Profile: Generation Scotland: Scottish Family Health Study (GS:SFHS). The study, its  
577 participants and their potential for genetic research on health and illness. *Int J Epidemiol.*  
578 2013;42:689–700.
- 579 41. Fischbach GD, Lord C. The Simons Simplex Collection: A Resource for Identification of  
580 Autism Genetic Risk Factors. *Neuron.* 2010;68:192–195.
- 581
- 582
- 583
- 584



585 **Acknowledgments**

586

587 **Conflict of interest:** The authors declare that they have no conflict of interest.

588

589 **Funding/Support:** This research was enabled by support provided by Calcul Quebec

590 (<http://www.calculquebec.ca>) and Compute Canada (<http://www.computecanada.ca>).

591 Sebastien Jacquemont is a recipient of a Bursary Professor fellowship of the Swiss National

592 Science Foundation, a Canada Research Chair in neurodevelopmental disorders, and a chair from

593 the Jeanne et Jean Louis Levesque Foundation. Catherine Schramm is supported by an Institute

594 for Data Valorization (IVADO) fellowship. Petra Tamer is supported by a Canadian Institute of

595 Health Research (CIHR) Scholarship Program. Guillaume Huguet is supported by the Sainte-

596 Justine Foundation, the Merit Scholarship Program for foreign students, and the Network of

597 Applied Genetic Medicine fellowships. Thomas Bourgeron is a recipient of a chair of the

598 Bettencourt-Schueler foundation. This work is supported by a grant from the Brain Canada

599 Multi-Investigator initiative and CIHR grant 159734 (Sebastien Jacquemont, Celia Greenwood,

600 Tomas Paus). The Canadian Institutes of Health Research and the Heart and Stroke Foundation of

601 Canada fund the Saguenay Youth Study (SYS). SYS was funded by the Canadian Institutes of

602 Health Research (Tomas Paus, Zdenka Pausova) and the Heart and Stroke Foundation of Canada

603 (Zdenka Pausova). Funding for the project was provided by the Wellcome Trust. This work was

604 also supported by an NIH award U01 MH119690 granted to Laura Almasy, Sebastien

605 Jacquemont and David Glahn and U01 MH119739. The authors wish to acknowledge the

606 resources of MSSNG ([www.mss.ng](http://www.mss.ng)), Autism Speaks and The Centre for Applied Genomics at

607 The Hospital for Sick Children, Toronto, Canada. We also thank the participating families for

608 their time and contributions to this database, as well as the generosity of the donors who

609 supported this program. We are grateful to all the families who participated in the Simons

610 Variation in Individuals Project (VIP) and the Simons VIP Consortium (data from Simons VIP  
611 are available through SFARI Base). We thank the coordinators and staff at the Simons VIP and  
612 SCC sites. We are grateful to all of the families at the participating SSC sites and the principal  
613 investigators (A. Beaudet, M.D., R. Bernier, Ph.D., J. Constantino, M.D., E. Cook, M.D., E.  
614 Fombonne, M.D., D. Geschwind, M.D., Ph.D., R. Goin-Kochel, Ph.D., E. Hanson, Ph.D., D.  
615 Grice, M.D., A. Klin, Ph.D., D. Ledbetter, Ph.D., C. Lord, Ph.D., C. Martin, Ph.D., D. Martin,  
616 M.D., Ph.D., R. Maxim, M.D., J. Miles, M.D., Ph.D., O. Ousley, Ph.D., K. Pelphrey, Ph.D., B.  
617 Peterson, M.D., J. Piggot, M.D., C. Saulnier, Ph.D., M. State, M.D., Ph.D., W. Stone, Ph.D., J.  
618 Sutcliffe, Ph.D., C. Walsh, M.D., Ph.D., Z. Warren, Ph.D., and E. Wijsman, Ph.D.). We  
619 appreciate obtaining access to phenotypic data on SFARI base.

620

621 **Additional Contributions:** Julien Buratti (Institute Pasteur), and Vincent Frouin, Ph.D.  
622 (Neurospin), acquired data for IMAGEN. Manon Bernard, BSc (database architect, The Hospital  
623 for Sick Children), and Helene Simard, MA, and her team of research assistants (Cégep de  
624 Jonquière) acquired data for the Saguenay Youth Study. Antoine Main, M.Sc. (UHC Sainte-  
625 Justine Research Center, HEC Montreal), Lionel Lemogo, M.Sc. (UHC Sainte-Justine Research  
626 Center), and Claudine Passo, Pg.D. (UHC Sainte-Justine Research Center), provided  
627 bioinformatical support. Maude Auger, Pg.D.; and Kristian Agbogba, B.Sc. (UHC Sainte-Justine  
628 Research Center), provided website development. Dr. Paus is the Tanenbaum Chair in Population  
629 Neuroscience at the Rotman Research Institute, University of Toronto, and the Dr. John and  
630 Consuela Phelan Scholar at Child Mind Institute, New York.

631

632 **Role of the Funder/Sponsor:** The funder had no role in the design and conduct of the study;  
633 collection, management, analysis, or interpretation of the data; preparation, review, or approval of  
634 the manuscript; or decision to submit the manuscript for publication.



636 **Tables and Figures**  
637

| Ascertainment         | Cohort                    | Array type          | n=     | Females, n (%) | Age in years Mean (SD) | Type of intelligence measures                                                                            | Z-scored intelligence measure Mean (SD) |
|-----------------------|---------------------------|---------------------|--------|----------------|------------------------|----------------------------------------------------------------------------------------------------------|-----------------------------------------|
| Unselected (n=20,151) | IMAGEN [36]               | 610Kq; 660Wq        | 1,744  | 891 (51%)      | 14.4 (0.4)             | WISC-IV (and g-factor, similarities score, vocabulary score, block design score, matrix reasoning score) | 0.44 (0.98) ***                         |
|                       | SYS children[37]          | 610Kq; HOE-12V      | 967    | 505 (52%)      | 15.0 (1.8)             | WISC-III (and g-factor using 63 cognitive measures†)                                                     | 0.30 (0.87) ***                         |
|                       | SYS parents[37]           | HOE-12V             | 602    | 321 (53%)      | 49.5 (4.9)             | g-factor, 12 cognitive measures‡                                                                         | 0 (1)                                   |
|                       | LBC1936[38]               | 610Kq               | 504    | 247 (49%)      | 70.0 (-)*              | Moray House Test (and g-factor)                                                                          | 0.05 (0.96) ***                         |
|                       | CaG-GSA[39]               | GSA                 | 2,074  | 1,094 (53%)    | 54.3 (7.6)             | g-factor, Reasoning, Memory, Reaction time                                                               | -0.02 (1.03)                            |
|                       | CaG-Omni2.5[39]           | Omni2.5             | 515    | 281 (55%)      | 52.4 (8.6)             |                                                                                                          | -0.10 (1.02)                            |
|                       | CaG (all)[39]             | GSA; Omni2.5        | 2,589  | 1,375 (53%)    | 53.9 (7.8)             |                                                                                                          | -0.03 (1.03)                            |
|                       | G-Scot[40]                | 610Kq               | 13,745 | 8,101 (59%)    | 46.7 (15.0)            | g-factor, Logical Memory, Digit Symbol, Verbal fluency, Mill Hill Vocabulary                             | 0.00 (0.99)                             |
| Autism (n=3,941)      | SSC-1Mv1[41]              | 1Mv1                | 332    | 44 (13%)       | 9.5 (3.2)              | WISC-IV n=19; DAS-II E-Y n=96; DAS-II S-A n=179; Mullen n=12; WASI-I n=26                                | -0.55 (1.59)                            |
|                       | SSC-1Mv3[41]              | 1Mv3                | 1,182  | 157 (13%)      | 8.8 (3.5)              | WISC-IV n=16; DAS-II E-Y n=531; DAS-II S-A n=539; Mullen n=77; WASI-I n=19                               | -0.98 (1.66)                            |
|                       | SSC-Omni2.5[41]           | Omni2.5             | 1,048  | 140 (13%)      | 9.2 (3.7)              | WISC-IV n=10; DAS-II E-Y n=403; DAS-II S-A n=494; Mullen n=124; WASI-I n=17                              | -1.25 (1.87)                            |
|                       | SSC (all)[41]             | 1Mv1; 1Mv3; Omni2.5 | 2,562  | 341 (13%)      | 9.03 (3.6)             | WISC-IV n=45; DAS-II E-Y n=1,030; DAS-II S-A n=1,212; Mullen n=213; WASI-I n=62                          | -1.03 (1.75)                            |
|                       | MSSNG[30]                 | WGS                 | 1,379  | 275 (20%)      | 9.2 (4.4)              | WISC-IV n=46; WASI-II n=338; Leiter n=372; Raven n=214; Stanford Binet n=281; WPPSI n=128                | -0.47 (1.58)                            |
| NDD** (n=551)         | Ste-Justine-probands      | Agilent 180 K array | 132    | 52 (39%)       | 7.23 (5.46)            | WISC-V n=36; WASI-II n=8; WPPSI-IV n=38; Leiter-R n=18; Mullen n=32                                      | -1.31 (1.02)                            |
|                       | Ste-Justine-siblings      |                     | 87     | 44 (50%)       | 7.75 (5.72)            | WISC-V n=28; WASI-II n=13; WPPSI-IV n=31; Leiter-R n=3; Mullen n=12                                      | -0.29 (0.98)                            |
|                       | Ste-Justine-parents       |                     | 310    | 180 (58%)      | 37.80 (7.13)           | WASI-II                                                                                                  | -0.10 (1.16)                            |
|                       | Ste-Justine-other members |                     | 22     | 12 (54%)       | 43 (21.27)             | WASI-II                                                                                                  | -0.04 (1.32)                            |

638  
639

**Table 1. Cohort descriptions**

640 Cohorts include 24,092 individuals, including 14,874 unrelated individuals. SSC and CaG  
641 cohorts were broken down into sub-samples based on array technology (Supplementary  
642 methods). †63 and ‡ 12 cognitive measures were respectively used to compute the g-factor in  
643 SYS children and parents (Supplementary methods). NDD: neurodevelopmental disorders, SYS:  
644 Saguenay Youth Study, CaG: CARTaGEN, LBC: Lothian Birth Cohort, SSC: Simons Simplex

645 Collection; n=number of individuals remaining for analysis after quality control. The mean and  
646 Standard Deviation (SD) for g-factor slightly deviate from 0 and 1 in some cohorts since they  
647 were computed on all available data (before the exclusion of some individuals for poor quality  
648 array) and summarized here only for individuals included in the analyses. \*All individuals from  
649 LBC1936 were assessed at 70 years old explaining the absence of SD computation. \*\*The NDD  
650 cohort was used only in the replication analysis and was not included in meta- or mega-analyses.  
651 \*\*\* We displayed the Z-scores of IQ, because IQ was preferred to g-factor for all analyses, even  
652 if results were similar (Supplementary Table 1 and 3).  
653

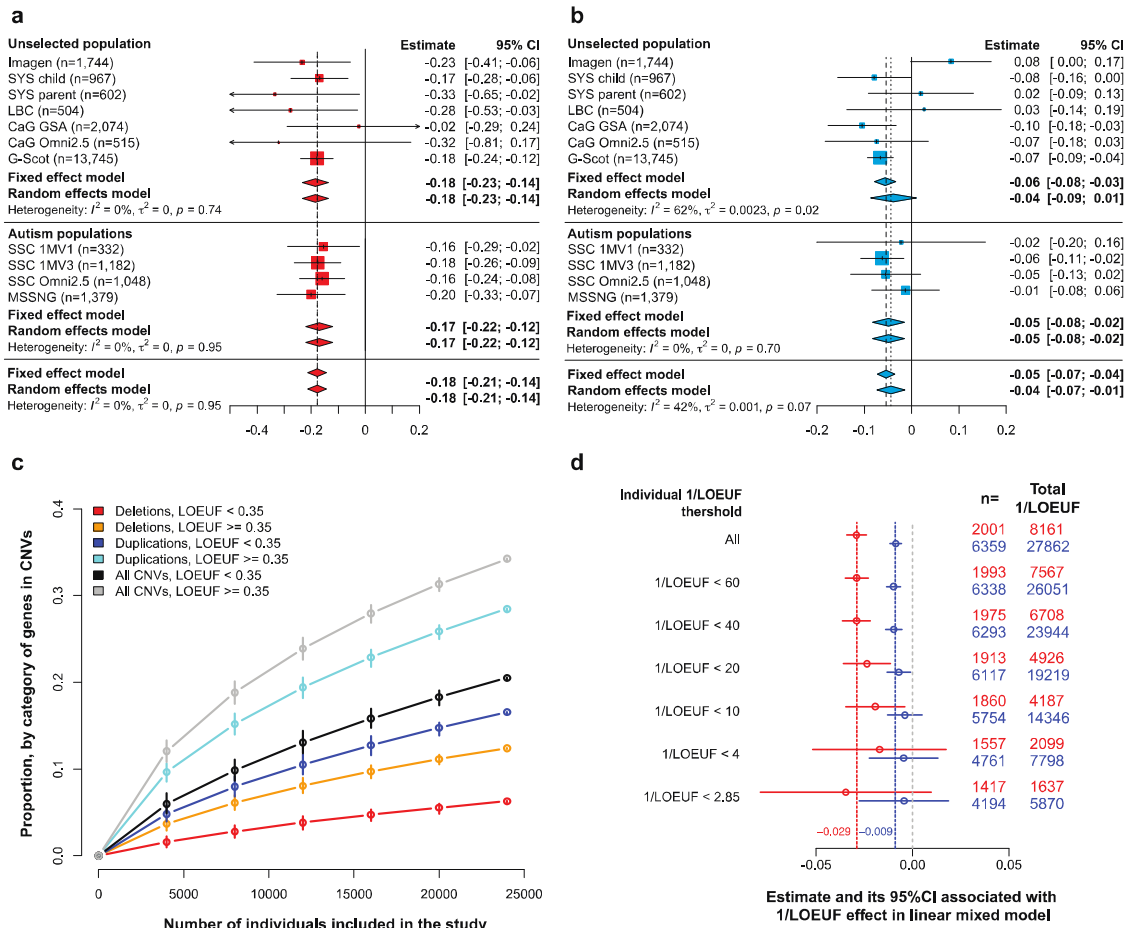

654

655 **Fig. 1. Effect of intolerant score on general intelligence measured for deletions and**

656 **duplications.**

657 Meta-analysis estimating the effect of deletions **a.** and duplications **b.**, measured by sum of pLI,

658 on general intelligence (Table S1). X-axis values represent z-scores of general intelligence.

659 Deleting one point of pLI decreases the general intelligence by 0.18 z-scores (2.7 points of IQ).

660 Duplicating one point of pLI decreases the general intelligence by 0.05 z-scores (0.75 points of

661 IQ). The squares represent the effect-size computed for each sample. Their size negatively

662 correlated to variance. Diamonds represent the summary effect across cohorts. Their lengths

663 correspond to the 95% confidence intervals of the mean effect-size. **c.** Estimated proportion of

664 the coding genome within each category defined by LOEUF, encompassed in CNVs present in

665 the mega-analysis according to sample size (randomly selected within the mega-analysis). We

666 observed  $N_{\text{CNVs gene}}=6,315$  with  $N_{\text{Del. gene}}=2,282$  and  $N_{\text{Dup. gene}}=5,223$ ). **d.** Estimated effect of  
667  $1/\text{LOEUF}$  on general intelligence after removing individuals with a sum of  $1/\text{LOEUF}$  larger than  
668 60, 40, 20, 10, 4 and 2.85 (2.85 corresponds to  $1/0.35$ , the cut-off for intolerance to pLoF  
669 gnomAD). n: number of individuals with a total sum of  $1/\text{LOEUF} > 0$ .  
670  
671





682 *CBL, SPAST, WDR87, NFE2L3, STARD9, TCF20, KMT2C, FAM200B, KDM5B, CHD2,*  
683 *BTF3, ITPR1, HMGXB3.* **b.** Effect-size of 1/LOEUF on general intelligence estimated in a model  
684 using two explanatory variables (sum of 1/LOEUF of deleted and duplicated genes) or 4  
685 explanatory variables (sum of 1/LOEUF of ID genes and non-ID genes for deletions and  
686 duplication).  
687  
688

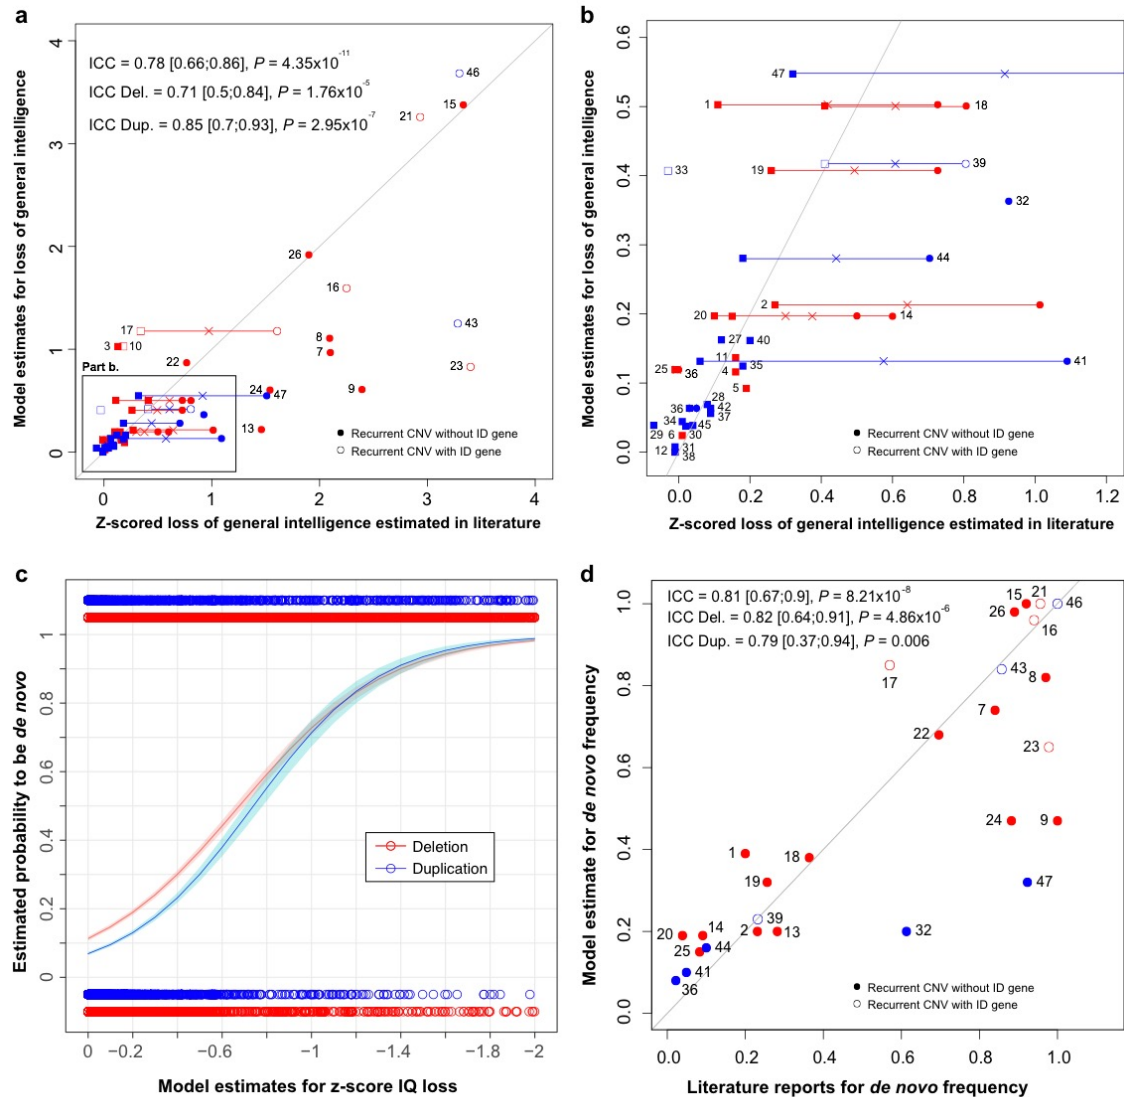

689

690 **Fig. 3. Concordance between model predictions and published observations for CNV effects**  
 691 **on general intelligence and for *de novo* frequency.**

692 **a. and b.** Concordance between model estimates (with 1/LOEUF and ID-genes) and literature of  
 693 clinical data and UKBB reports for general intelligence loss observed in respectively 27 and 33  
 694 recurrent CNVs for a total of ascertained carriers of 47 recurrent CNVs (Supplementary Table  
 695 15). X- and Y-values: effect size of CNVs on z-scored general intelligence. **b.** Zoom of the  
 696 rectangle drawn in the lower left section of panel **a.** We represented values from clinical data by a  
 697 circle and those from UKBB data by a square. The cross represents the mean value of z-scored  
 698 IQ loss for the 13 recurrent CNVs observed both in literature and in UKBB. **c. and d.** The model

699 uses 2 explanatory variables (1/LOEUF of non-ID-genes and ID-genes). **c.** Probability of *de novo*  
700 estimated by our *de novo* model (Y-axis) according to the loss of IQ estimated by a model using  
701 1/LOEUF for ID and non-ID genes as two explanatory variables (X-axis). The *de novo* model  
702 was fitted on 13,114 deletions (red) and 13,323 duplications (blue) with available inheritance  
703 information observed in DECIPHER, CHU Sainte-Justine, SSC, MSSNG, SYS and G-Scot. **d.**  
704 Concordance between *de novo* frequency observed in DECIPHER (X-axis) and the probability of  
705 being *de novo* estimated by models when excluding recurrent CNVs of the training dataset (Y-  
706 axis) 1/LOEUF for ID and non-ID genes as an explanatory variable for 27 recurrent CNVs. The  
707 first bisector represents the perfect concordance. Deletions are in red and duplications in blue.  
708 Empty circles or square are CNVs encompassing ID-genes. ICC indicates intraclass correlation  
709 coefficient (3, 1). Each point represents a recurrent CNV: (1) TAR Deletion; (2) 1q21.1 Deletion;  
710 (3) 2q11.2 Deletion; (4) 2q13 Deletion; (5) *NRXNI* Deletion; (6) 2q13 (*NPHPI*) Deletion; (7)  
711 3q29 (*DLGI*) Deletion; (8) 7q11.23 (William-Beuren) Deletion; (9) 8p23.1 Deletion; (10)  
712 10q11.21q11.23 Deletion; (11) 13q12.12 Deletion; (12) 13q12 (*CRYLI*) Deletion; (13) 15q13.3  
713 (BP4-BP5) Deletion; (14) 15q11.2 Deletion; (15) 16p11.2-p12.2 Deletion; (16) 16p13.3 ATR-16  
714 syndrome Deletion; (17) 16p11.2 Deletion; (18) 16p11.2 distal Deletion; (19) 16p13.11 Deletion;  
715 (20) 16p12.1 Deletion; (21) 17p11.2 (Smith-Magenis) Deletion; (22) 17q12 Deletion; (23)  
716 17q21.31 Deletion; (24) NF1-microdeletion syndrome Deletion; (25) 17p12 (*HNPP*) Deletion;  
717 (26) 22q11.2 Deletion; (27) TAR Duplication; (28) 1q21.1 Duplication; (29) 2q21.1 Duplication;  
718 (30) 2q13 Duplication; (31) 2q13 (*NPHPI*) Duplication; (32) 7q11.23 Duplication; (33)  
719 10q11.21q11.23 Duplication; (34) 13q12.12 Duplication; (35) 15q11q13 (BP3-BP4) Duplication;  
720 (36) 15q11.2 Duplication; (37) 15q13.3 Duplication; (38) 15q13.3 (*CHRNA7*) Duplication; (39)  
721 16p11.2 Duplication; (40) 16p11.2 distal Duplication; (41) 16p13.11 Duplication; (42) 16p12.1  
722 Duplication; (43) 17p11.2 Duplication; (44) 17q12 (*HNF1B*) Duplication; (45) 17p12 (*CMT1A*)  
723 Duplication; (46) Trisomic 21 Duplication; (47) 22q11.2 Duplication.



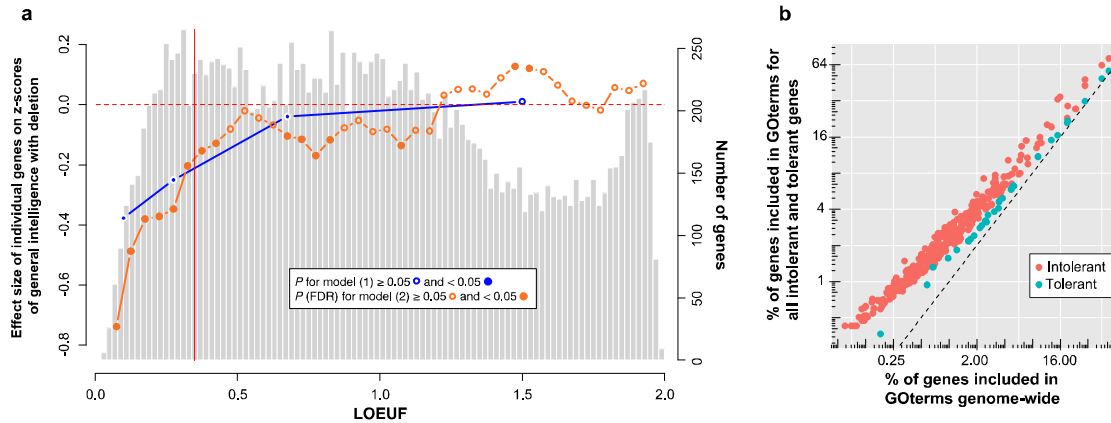

725

726 **Fig. 4. Effect-size on general intelligence of individual genes encompassed in CNVs and**  
727 **their GOterms enrichment.**

728 The light grey histogram represents the distribution of LOEUF values for 18,451 autosomal  
729 genes. The blue line represents the estimates for a gene in each of the 4 categories of LOEUF  
730 included in the model (Supplementary methods): highly intolerant genes (LOEUF < 0.2, n=980),  
731 moderately intolerant genes ( $0.2 \leq \text{LOEUF} < 0.35$  n=1,762), tolerant genes ( $0.35 \leq \text{LOEUF} < 1$ ,  
732 n=7,442) and genes highly tolerant to pLoF (LOEUF  $\geq 1$ , n=8,267). The orange line represents the  
733 estimated effect-size of 37 categories of genes based on their LOEUF values (sliding  
734 windows=0.15) in the model (Supplementary methods). Genes with a LOEUF below 0.35  
735 (vertical red line) are considered to be intolerant to pLoF by gnomAD. Left Y-axis values: z-  
736 scored general intelligence (1 z-score is equivalent to 15 points of IQ) for deletion. Right Y-axis  
737 values: number of genes represented in the histogram. For **Fig. 6b** each point represents a  
738 GOterm for which enrichment was observed for all intolerant (n=2,742) or tolerant genes  
739 (n=7,442) (**b.**), for all intolerant (n=609) or tolerant genes (n=2,251) encompassed in CNVs (C)  
740 when compared to the whole coding genome (Bonferroni). **b.** X-axis: % of genes included in the

741 GOf term genome-wide; Y-axis: % of genes included in the GOf term for all intolerant

742 ( $0 < \text{LOEUF} < 0.35$ ) and tolerant genes ( $0.35 \leq \text{LOEUF} < 1$ ).
